# Supplementary material
Source: PubMed Central journal article supplement (PMC1635099)

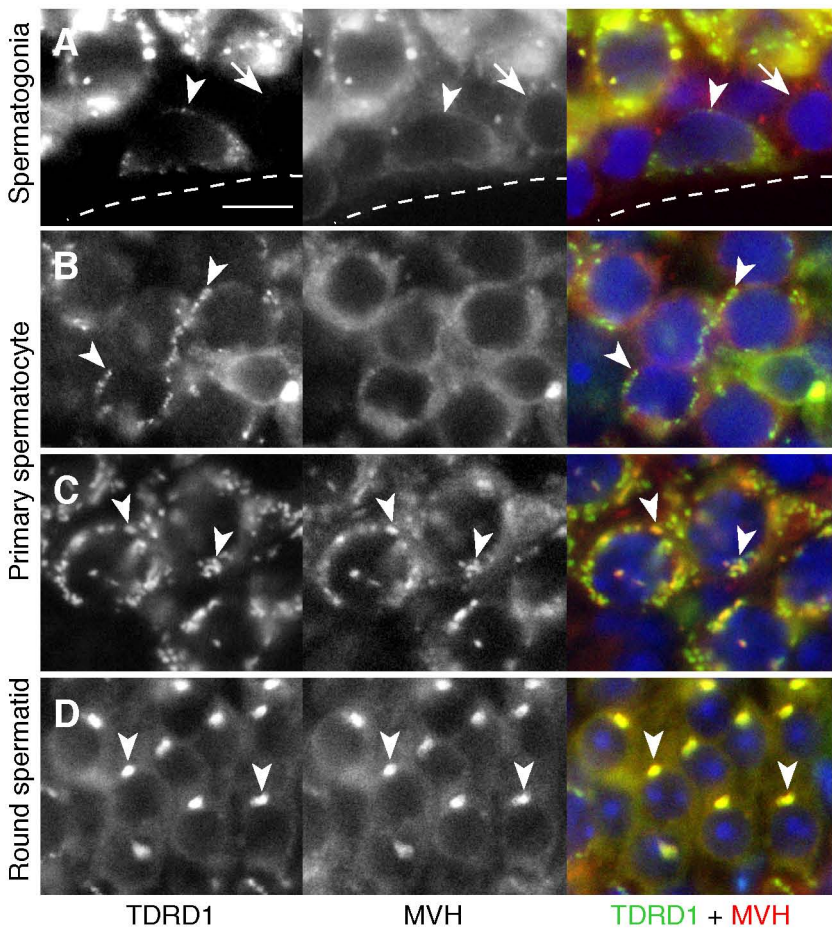

Supplement: pnas_0601878103_3.pdf [file pnas_0601878103_3.pdf]
